# Supplementary material
Source: publisher figshare collection journal article supplement (https://acs.figshare.com/ndownloader/files/3583407)
Supplement: Supplementary file 1 [file 3583407]

# Supporting Information

## Pressure-generated hydrogen bonds and the role of subtle molecular features in tetrahydrofuran

*Kamil F. Dziubek, Damian Jęczyński, Andrzej Katrusiak\**

Faculty of Chemistry, Adam Mickiewicz University, ul. Grunwaldzka 6, 60-780 Poznań,  
Poland

katran@amu.edu.pl

### Experimental procedures

#### *Loading a diamond anvil cell and crystal growth*

Tetrahydrofuran ( $\text{C}_4\text{H}_8\text{O}$ ; Aldrich, 99+% purity) was used without further purification. A single crystal of  $\text{C}_4\text{H}_8\text{O}$  was grown *in situ* in a modified Merrill-Bassett<sup>1</sup> diamond-anvil cell (DAC). The gasket was made of 0.3 mm thick steel foil and the initial diameter of the hole was 0.4 mm. Immediately after filling the chamber, DAC was closed and pressure increased in small steps. Although the compression was performed very slowly, vitrification was observed on several attempts and no crystal could be obtained, even though we tried to trigger the crystallization by cycled heating and cooling of the sample and by subjecting it to ultrasounds. Eventually, the sample at 2.52 GPa was placed in dry ice until it froze forming a polycrystalline mass. Then the DAC was heated with a hot-air gun until all the crystallites but one melted at 369 K, after which it was slowly cooled over 8 hours until the single crystal grew to entirely fill the pressure chamber at room temperature and pressure stabilized at 2.25 GPa. It is noteworthy that the crystal exhibited an unusual habit (a prism with a four-angle star-like base, see Figure 5 in the main article). This single crystal was used for the X-ray diffraction experiments. The process of obtaining single crystals at 3.3 GPa and 3.8 GPa by tightening the DAC screws and heating DAC to the equilibrium temperatures of liquid and solid phase coexistence of 383 K and 443 K, respectively proceed smoothly and took about 6 h in each case. At a still higher pressure a single crystal could not be grown due to the rapid

increase in sample viscosity.<sup>2</sup> We have also tried to conduct a crystallization from THF:methanol:ethanol mixture (5:4:1, v/v/v), but no sign of crystallization was observed up to 5 GPa.

#### *Pressure and temperature determination*

The temperature during the crystal growth process was controlled using a AZ Instrument 8852 thermometer equipped with a K-type (chromel-alumel) thermocouple probe, which touched a diamond anvil. Pressure was calibrated by measuring the shift of the R1 ruby fluorescence line,<sup>3</sup> using a BETSA PRL spectrometer with an accuracy of 0.05 GPa.

#### *Data collection and reduction*

The DAC was mounted on a KUMA KM4 diffractometer equipped with a CCD detector and a monochromated Mo sealed-tube source (K $\alpha$  radiation,  $\lambda = 0.71073$  Å). The alignment was performed using a gasket-shadow centering procedure.<sup>4</sup> Data collection was carried out using a pre-designed strategy combining  $\omega$ - and  $\phi$ -scans.<sup>4</sup> The overall data-collection time was 19.5 h with an exposure time of 30 s and rotation of 0.8 ° per frame. The CrysAlisPro program suite was used for data collection, determination of the UB-matrices, initial data reduction, and Lp correction. Then the reflection intensities were corrected for the DAC absorption and gasket shadowing<sup>5</sup> and the diamond-anvil reflections were eliminated. The structure was solved straightforwardly using direct methods (SHELXS-97) and subsequently refined against  $F^2$  with SHELXL-97<sup>6</sup>. The O- and C-atoms were refined with anisotropic displacement parameters, and the isotropic displacement parameters of the H-atoms were set to 1.3 times the equivalent isotropic displacement parameter of their carrier atoms. All the C-H bond lengths were restrained to be equal within a standard deviation of 0.02 Å using the SADI command of SHELXL-97. The refinement and experimental details are presented in Table S1.

#### *References*

- (1) Merrill, L.; Bassett, W. A. Miniature diamond anvil pressure cell for single crystal x-ray diffraction studies. *Rev. Sci. Instrum.* **1974**, *45*, 290-294.
- (2) Bridgman, P. W. The effects of pressure on the viscosity of forty-three pure liquids. *Proc. Am. Acad. Arts Sci.* **1926**, *61*, 57–99.
- (3) Piermarini, G. J.; Block, S.; Barnett, J. D.; Forman, R. A. Calibration of the pressure dependence of the  $R_1$  ruby fluorescence line to 195 kbar. *J. Appl. Phys.* **1975**, *46*, 2774–2780.
- (4) Budzianowski, A.; Katrusiak A. High-pressure crystallographic experiments with a CCD detector. In *High-Pressure Crystallography*; Katrusiak, A., McMillan, P. F., Eds.; Kluwer: Dordrecht, the Netherlands, **2004**; pp 157–168.
- (5) Katrusiak, A. *REDSHADE, A program for correcting reflections intensities for DAC absorption and gasket shadowing*; Adam Mickiewicz University: Poznań, Poland, **2003**.
- (6) Sheldrick, G. M. A short history of *SHELX*. *Acta Crystallogr., Sect. A* **2008**, *64*, 112–122.

Table S1. Crystal data and details of structure refinement for THF at high pressure.

| pressure                                                                   | 2.25(5) GPa                                                                                                      | 3.26(5) GPa                                                                                                      | 3.80(5) GPa                                                                                                    |
|----------------------------------------------------------------------------|------------------------------------------------------------------------------------------------------------------|------------------------------------------------------------------------------------------------------------------|----------------------------------------------------------------------------------------------------------------|
| temperature(K)                                                             | 295(2)                                                                                                           | 295(2)                                                                                                           | 295(2)                                                                                                         |
| crystal size (mm)                                                          | 0.40x0.43x0.20                                                                                                   | 0.41x0.41x0.20                                                                                                   | 0.41x0.41x0.20                                                                                                 |
| crystal system                                                             | monoclinic                                                                                                       | monoclinic                                                                                                       | monoclinic                                                                                                     |
| space group                                                                | <i>C2/c</i>                                                                                                      | <i>C2/c</i>                                                                                                      | <i>C2/c</i>                                                                                                    |
| unit cell dimensions (Å)                                                   | a = 5.917(2)<br>b = 8.719(4)<br>c = 7.411(6)<br>$\beta$ = 108.37(7)                                              | a = 5.840(3)<br>b = 8.636(4)<br>c = 7.288(7)<br>$\beta$ = 109.02(8)                                              | a = 5.816(3)<br>b = 8.634(15)<br>c = 7.237(11)<br>$\beta$ = 109.41(11)                                         |
| volume (Å <sup>3</sup> )                                                   | 362.9(4)                                                                                                         | 347.5(4)                                                                                                         | 342.8(8)                                                                                                       |
| Z                                                                          | 4                                                                                                                | 4                                                                                                                | 4                                                                                                              |
| $\rho_{\text{calcd}}$ (g cm <sup>3</sup> )                                 | 1.320                                                                                                            | 1.378                                                                                                            | 1.397                                                                                                          |
| $\mu$ (Mo K $\alpha$ ) (mm <sup>-1</sup> )                                 | 0.092                                                                                                            | 0.096                                                                                                            | 0.097                                                                                                          |
| F(000) (e)                                                                 | 160                                                                                                              | 160                                                                                                              | 160                                                                                                            |
| 2 $\theta$ max (°)                                                         | 58.46                                                                                                            | 58.26                                                                                                            | 49.94                                                                                                          |
| 2 $\theta$ range (°)                                                       | 8.64-58.46                                                                                                       | 8.26-58.26                                                                                                       | 8.8-49.94                                                                                                      |
| limiting indices                                                           | -6 $\rightarrow$ h $\rightarrow$ 6<br>-10 $\rightarrow$ k $\rightarrow$ 10<br>-6 $\rightarrow$ l $\rightarrow$ 6 | -6 $\rightarrow$ h $\rightarrow$ 6<br>-10 $\rightarrow$ k $\rightarrow$ 10<br>-6 $\rightarrow$ l $\rightarrow$ 6 | -6 $\rightarrow$ h $\rightarrow$ 6<br>-8 $\rightarrow$ k $\rightarrow$ 8<br>-6 $\rightarrow$ l $\rightarrow$ 6 |
| reflections collected/unique                                               | 188/170                                                                                                          | 184/174                                                                                                          | 142/136                                                                                                        |
| $R_{\text{int}}$                                                           | 0.0550                                                                                                           | 0.0680                                                                                                           | 0.0537                                                                                                         |
| observed reflections<br>[ $I > 4\sigma(I)$ ]                               | 170                                                                                                              | 174                                                                                                              | 136                                                                                                            |
| data/parameters                                                            | 188/36                                                                                                           | 184/36                                                                                                           | 142/ 36                                                                                                        |
| goodness of fit ( $F^2$ )                                                  | 1.127                                                                                                            | 1.154                                                                                                            | 1.366                                                                                                          |
| final $R$ indices ( $I > 4\sigma(I)$ )                                     | 0.0550                                                                                                           | 0.0535                                                                                                           | 0.0513                                                                                                         |
| $\Delta\sigma_{\text{max}}, \Delta\sigma_{\text{min}}$ (e Å <sup>3</sup> ) | 0.12/ -0.12                                                                                                      | 0.11/ -0.12                                                                                                      | 0.130/-0.134                                                                                                   |
| DAC transmission min/max                                                   | 0.873/0.998                                                                                                      | 0.873/0.998                                                                                                      | 0.886/0.998                                                                                                    |
| gasket shadowing min/max                                                   | 0.607/0.966                                                                                                      | 0.615/0.965                                                                                                      | 0.633/0.968                                                                                                    |
| total transmission                                                         | 0.518/0.946                                                                                                      | 0.525/0.945                                                                                                      | 0.561/0.966                                                                                                    |

Table S2. Bond angles (°), torsion angles (°) and  $q_2$  Cremer–Pople ring puckering parameters (Å) in THF crystal structure. Symmetry code: i =  $-x$ ,  $y$ ,  $-z+0.5$ . The structures of perdeuterated THF have been marked with asterisks.

| T/p                | C2–O1–C2 <sup>i</sup> | O1–C2–C3 | C2–C3–C3 <sup>i</sup> | C2 <sup>i</sup> –O1–C2–C3 | O1–C2–C3–C3 <sup>i</sup> | C2–C3–C3 <sup>i</sup> –C2 <sup>i</sup> | $q_2$    |
|--------------------|-----------------------|----------|-----------------------|---------------------------|--------------------------|----------------------------------------|----------|
| 5 K/<br>0.1 MPa*   | 109.9(3)              | 106.4(2) | 102.6(2)              | –11.3(2)                  | 28.8(2)                  | –34.5(2)                               | 0.343(2) |
| 103 K/<br>0.1 MPa  | 108.2(4)              | 107.4(4) | 102.0(4)              | –11.5(4)                  | 29.7(4)                  | –34.9(4)                               | 0.348(5) |
| 120 K/<br>0.1MPa*  | 110.2(3)              | 106.9(3) | 102.0(2)              | –11.3(2)                  | 28.4(2)                  | –33.7(2)                               | 0.340(2) |
| 148 K/<br>0.1.MPa  | 109.8(3)              | 106.7(4) | 101.9(3)              | –11.7(3)                  | 29.6(3)                  | –35.2(4)                               | 0.355(4) |
| 295 K/<br>2.25 GPa | 110.7(5)              | 105.7(4) | 103.8(2)              | –10.11(11)                | 26.3(3)                  | –31.9(3)                               | 0.311(4) |
| 295 K/<br>3.26 GPa | 110.4(4)              | 105.9(3) | 103.80(19)            | –10.15(10)                | 26.4(3)                  | –32.0(3)                               | 0.312(4) |
| 295 K/<br>3.80 GPa | 109.1(7)              | 106.9(4) | 103.5(2)              | –10.23(15)                | 26.4(3)                  | –31.7(4)                               | 0.309(4) |

Table S3. Angles (°) between the H...O contact directions and the putative lone pair direction (LP), as calculated for a tetrahedral  $sp^3$  configuration, with the oxygen atom in the center, and the hydrogen atoms and the lone pairs in the corners. Symmetry codes: ii =  $x-0.5$ ,  $0.5+y$ ,  $z$ ; iii =  $-x$ ,  $-2-y$ ,  $1-z$ ; iv =  $0.5-x$ ,  $-1.5-y$ ,  $1-z$ . The structures of perdeuterated THF have been marked with asterisks.

| T/p            | $\angle(\text{H31}\cdots\text{O1}^{\text{ii}}, \text{LP})$ | $\angle(\text{H22}\cdots\text{O1}^{\text{iii}}, \text{LP})$ | $\angle(\text{H32}\cdots\text{O1}^{\text{iv}}, \text{LP})$ |
|----------------|------------------------------------------------------------|-------------------------------------------------------------|------------------------------------------------------------|
| 5 K/0.1 MPa*   | 24                                                         | 36                                                          | 46                                                         |
| 103 K/0.1 MPa  | 23                                                         | 35                                                          | 46                                                         |
| 120 K/0.1MPa*  | 24                                                         | 36                                                          | 46                                                         |
| 148 K/0.1.MPa  | 24                                                         | 35                                                          | 46                                                         |
| 295 K/2.25 GPa | 25                                                         | 36                                                          | 46                                                         |
| 295 K/3.26 GPa | 24                                                         | 37                                                          | 47                                                         |
| 295 K/3.80 GPa | 24                                                         | 38                                                          | 47                                                         |

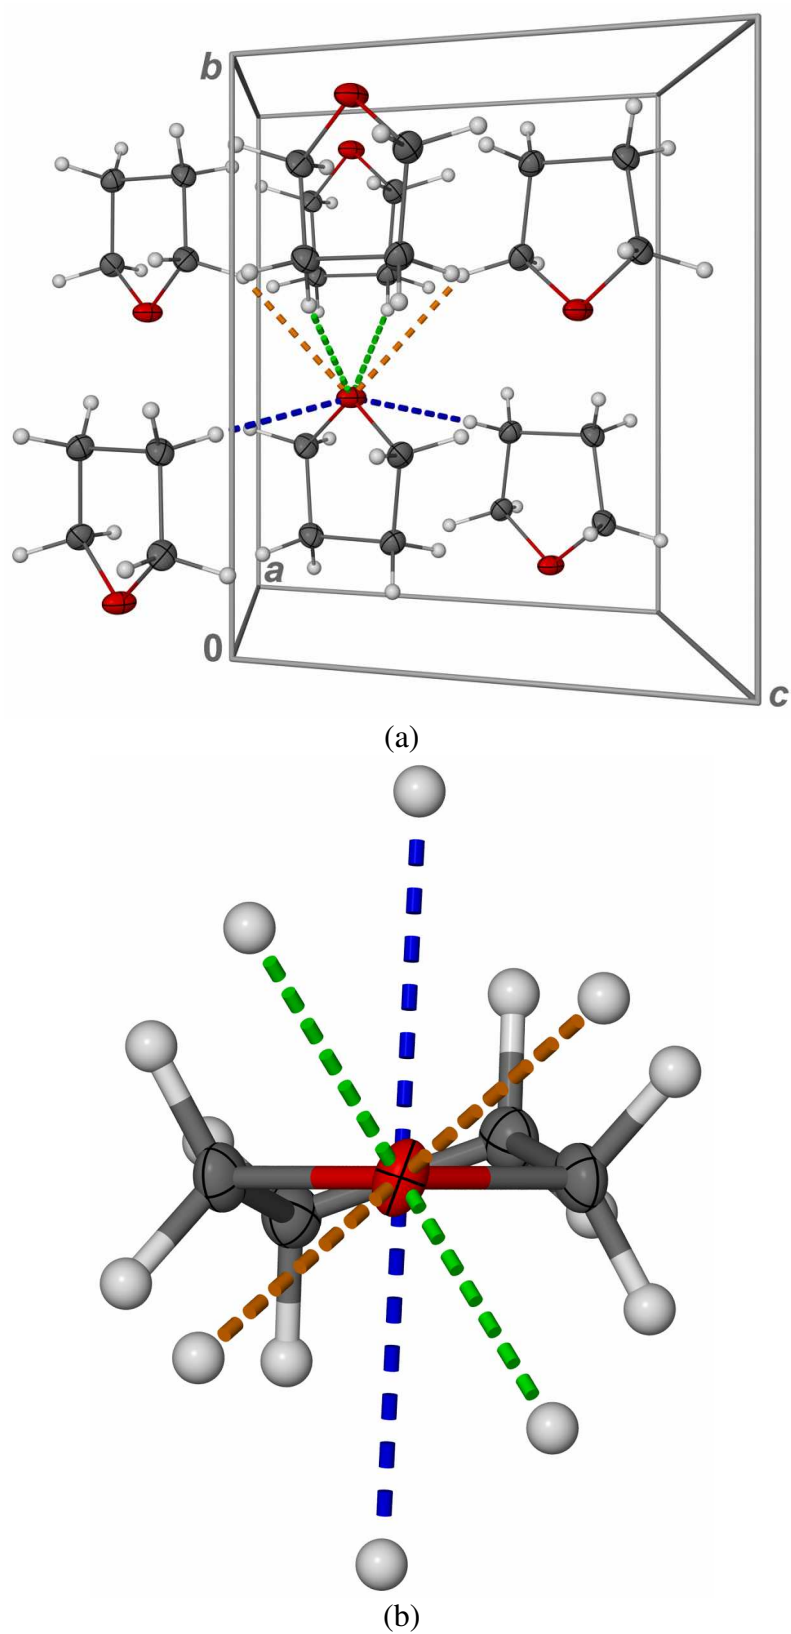

Figure S1. Three symmetry-related pairs of short H...O contacts (dashed lines) in the THF crystal structure at 3.80 GPa shown along [100] (a); and one THF molecule viewed along its  $C_2$  axis with six H atoms coordinating the oxygen atom (b). The color code corresponds to that in Figure 1 in the main article.

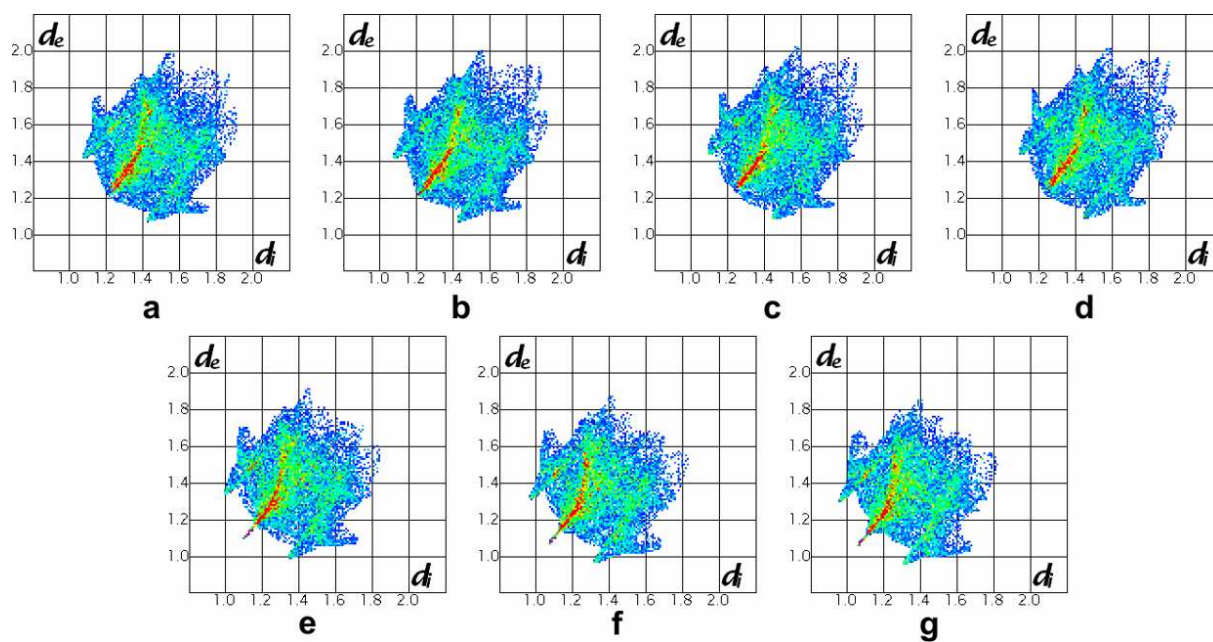

Figure S2. Hirshfeld fingerprints plots of the THF structures at (a) 0.1 MPa/5 K; (b) 0.1MPa/103K; (c) 0.1 MPa/120K; (d) 0.1 MPa/148K; (e) 2.25 GPa/295 K; (f) 3.26 GPa/295 K and (g) 3.80 GPa/295 K.
